# Supplementary material
Source: HighWire-hosted journal article supplement (https://erj.ersjournals.com/content/58/3/2100783)
Supplement: inline-supplementary-material-1 [file inline-supplementary-material-1.pdf]

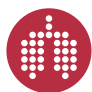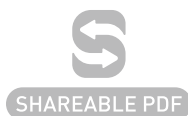

# *Mycobacterium tuberculosis* borderline *rpoB* mutations: emerging from the unknown

Armand Van Deun<sup>1</sup>, Tom Decroo <sup>2,3</sup>, Kya Jai Maug Aung<sup>4</sup>, Mohamed Anwar Hossain<sup>4</sup>, Mourad Gumusboga<sup>5</sup>, Willem Bram De Rijk<sup>5</sup>, Sabira Tahseen <sup>6</sup>, Bouke Catherine de Jong <sup>5</sup> and Leen Rigouts<sup>5</sup>

<sup>1</sup>Independent Consultant, Leuven, Belgium. <sup>2</sup>Institute of Tropical Medicine, Unit of HIV and TB, Dept of Clinical Sciences, Antwerp, Belgium. <sup>3</sup>Research Foundation Flanders, Brussels, Belgium. <sup>4</sup>Damien Foundation Bangladesh, Dhaka, Bangladesh. <sup>5</sup>Institute of Tropical Medicine, Unit of Mycobacteriology, Dept of Biomedical Sciences, Antwerp, Belgium. <sup>6</sup>National Tuberculosis Control Program and Pakistan National Tuberculosis Reference laboratory, Islamabad, Pakistan.

Tom Decroo (tdecroo@itg.be)

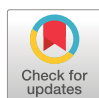

Shareable abstract (@ERSpublications)

**Despite their name, borderline *rpoB* mutations are correlated with unfavourable outcomes when rifampicin-throughout treatment is used. They may become the drivers of rifampicin-resistant tuberculosis. Second-line treatment is recommended.** <https://bit.ly/3nbkZjt>

**Cite this article as:** Van Deun A, Decroo T, Aung KJM, et al. *Mycobacterium tuberculosis* borderline *rpoB* mutations: emerging from the unknown. *Eur Respir J* 2021; 58: 2100783 [DOI: 10.1183/13993003.00783-2021].

This single-page version can be shared freely online.

Copyright ©The authors 2021. For reproduction rights and permissions contact [permissions@ersnet.org](mailto:permissions@ersnet.org)

Received: 10 March 2021  
Accepted: 20 April 2021

*To the Editor:*

Rifampicin drives the efficacy of the current first-line treatment regimen for tuberculosis (TB) [1]. Mutations in the *rpoB* gene cause rifampicin resistance (RR) of varying levels. Common mutations typically confer high-level, “high-confidence” resistance, providing a selective advantage to *Mycobacterium tuberculosis* during treatment at low fitness cost [2]. Growth-based phenotypic drug-susceptibility testing (pDST) is very reliable for high-confidence mutations. Mutations conferring low-level resistance at high fitness cost are easily lost during primary culture or will cause phenotypically false-susceptible results if not given enough time for growth, especially with the widely used automated MGIT 960 DST [3]. Due to disagreement on their significance, such *rpoB* mutations were called “disputed”.

Copyright ©The authors 2021. For reproduction rights and permissions contact [permissions@ersnet.org](mailto:permissions@ersnet.org)
